# Supplementary material for: A Network Meta-Analysis of Efficacy and Evaluation of Safety of Subcutaneous Pegylated Interferon Beta-1a versus Other Injectable Therapies for the Treatment of Relapsing-Remitting Multiple Sclerosis
Source: PLoS One. 2015 Jun 3;10(6):e0127960. doi: 10.1371/journal.pone.0127960 (PMC4454514; doi:10.1371/journal.pone.0127960)
Supplement: S4 Dataset — (XLSX) [file pone.0127960.s005.xlsx]

## Sheet: Sheet1
									With INCOMIN
Results_Vague priors for between study variance									Placebo	1				Results _weakly informative prior for between trail variance
									IFN beta-1a 30 mcg once weekly	2
Dbar = post.mean of -2logL; Dhat = -2LogL at post.mean of stochastic nodes									IFN beta-1b 250 mcg EOD	3				Dbar = post.mean of -2logL; Dhat = -2LogL at post.mean of stochastic nodes
	Dbar	Dhat	pD	DIC					IFN beta-1a 44 mcg tiw	4					Dbar	Dhat	pD	DIC
r	95.834	83.615	12.219	108.053					GA 20 mg od	5				r	95.75	83.358	12.392	108.142
total	95.834	83.615	12.219	108.053					PEG IFN beta-1a 125 mcg q2w	6				total	95.75	83.358	12.392	108.142
	HR[1,2]	2.084	0.6489	0.01014	1.127	1.987	3.659	10001	40000			HR[1,2]	2.118	0.6642	0.0108	1.139	2.013	3.715	10001	40000
	HR[1,3]	1.113	0.2438	0.005187	0.7131	1.086	1.657	10001	40000			HR[1,3]	1.097	0.2481	0.005217	0.6875	1.073	1.651	10001	40000
	HR[1,4]	1.24	0.2641	0.005146	0.7958	1.215	1.817	10001	40000			HR[1,4]	1.228	0.2709	0.005487	0.7837	1.201	1.845	10001	40000
	HR[1,5]	2.034	0.6853	0.01272	1.029	1.92	3.673	10001	40000			HR[1,5]	2.007	0.6889	0.01352	1.017	1.892	3.638	10001	40000
	HR[2,1]	0.5246	0.1573	0.002554	0.2733	0.5032	0.8874	10001	40000			HR[2,1]	0.5167	0.1569	0.002519	0.2692	0.4967	0.8778	10001	40000
	HR[2,3]	0.5813	0.2119	0.003857	0.2688	0.5479	1.092	10001	40000			HR[2,3]	0.5639	0.208	0.003907	0.2559	0.531	1.059	10001	40000
	HR[2,4]	0.6462	0.228	0.004185	0.3026	0.6127	1.181	10001	40000			HR[2,4]	0.6297	0.2244	0.00431	0.2933	0.5966	1.163	10001	40000
	HR[2,5]	1.064	0.484	0.009494	0.4105	0.9677	2.295	10001	40000			HR[2,5]	1.032	0.4691	0.009535	0.3998	0.942	2.191	10001	40000
	HR[3,1]	0.9415	0.2059	0.004383	0.6035	0.9205	1.402	10001	40000			HR[3,1]	0.9589	0.2199	0.00469	0.6057	0.9318	1.455	10001	40000
	HR[3,2]	1.953	0.7293	0.01289	0.9161	1.825	3.72	10001	40000			HR[3,2]	2.022	0.7738	0.0151	0.9447	1.883	3.907	10001	40000
	HR[3,4]	1.136	0.2221	0.003253	0.7589	1.12	1.625	10001	40000			HR[3,4]	1.143	0.2266	0.003622	0.7719	1.119	1.644	10001	40000
	HR[3,5]	1.891	0.7006	0.0141	0.8919	1.767	3.589	10001	40000			HR[3,5]	1.901	0.7295	0.0167	0.8756	1.76	3.686	10001	40000
	HR[4,1]	0.8434	0.1811	0.00361	0.5503	0.8231	1.257	10001	40000			HR[4,1]	0.8538	0.1877	0.003824	0.5421	0.8327	1.277	10001	40000
	HR[4,2]	1.746	0.6356	0.01153	0.8466	1.632	3.305	10001	40000			HR[4,2]	1.796	0.6608	0.01274	0.8607	1.676	3.41	10001	40000
	HR[4,3]	0.9139	0.1807	0.002704	0.6152	0.8926	1.318	10001	40000			HR[4,3]	0.909	0.1781	0.002846	0.6084	0.8934	1.295	10001	40000
	HR[4,5]	1.684	0.5898	0.01023	0.8394	1.583	3.078	10001	40000			HR[4,5]	1.683	0.6074	0.01253	0.8091	1.575	3.132	10001	40000
	HR[5,1]	0.546	0.1795	0.003538	0.2723	0.5208	0.9729	10001	40000			HR[5,1]	0.5552	0.1848	0.003694	0.275	0.5285	0.9842	10001	40000
	HR[5,2]	1.135	0.5205	0.01022	0.4358	1.033	2.436	10001	40000			HR[5,2]	1.171	0.5326	0.01069	0.4568	1.062	2.505	10001	40000
	HR[5,3]	0.6002	0.2183	0.004424	0.2788	0.5659	1.122	10001	40000			HR[5,3]	0.6019	0.2262	0.005114	0.2713	0.5682	1.142	10001	40000
	HR[5,4]	0.6645	0.2254	0.00411	0.3251	0.6318	1.192	10001	40000			HR[5,4]	0.67	0.2369	0.004859	0.3193	0.6348	1.236	10001	40000
	rh[1]	0.8243	0.1327	0.003637	0.5925	0.8149	1.11	10001	40000			rh[1]	0.8181	0.1337	0.003834	0.5841	0.8087	1.108	10001	40000
	rh[2]	0.4315	0.1458	0.00333	0.2083	0.4131	0.7672	10001	40000			rh[2]	0.421	0.1408	0.003325	0.2049	0.4005	0.7465	10001	40000
	rh[3]	0.7674	0.1732	0.004889	0.4824	0.7506	1.146	10001	40000			rh[3]	0.7754	0.1834	0.005537	0.4838	0.7506	1.207	10001	40000
	rh[4]	0.6832	0.1303	0.003368	0.4636	0.6705	0.97	10001	40000			rh[4]	0.6866	0.137	0.003938	0.456	0.6745	0.984	10001	40000
	rh[5]	0.4388	0.1241	0.002007	0.2403	0.4244	0.7154	10001	40000			rh[5]	0.4425	0.1274	0.002015	0.2389	0.4286	0.7298	10001	40000
	tau2	0.3687	0.3301	0.00288	0.09216	0.2852	1.157	10001	40000			tau2	0.48	0.4941	0.00462	0.109	0.3521	1.635	10001	40000
									Without INCOMIN
	node	mean	sd	MC error	0.025	median	0.975	start	sample			node	mean	sd	MC error	0.025	median	0.975	start	sample
	HR[1,2]	1.923	1.615	0.02206	0.4709	1.504	5.858	10001	40000			HR[1,2]	1.939	1.681	0.02425	0.4554	1.491	6.141	10001	40000
	HR[1,3]	1.058	0.2318	0.004624	0.6676	1.034	1.575	10001	40000			HR[1,3]	1.05	0.2405	0.005352	0.6569	1.026	1.598	10001	40000
	HR[1,4]	1.182	0.2581	0.00479	0.7527	1.157	1.77	10001	40000			HR[1,4]	1.156	0.2636	0.005516	0.7251	1.128	1.753	10001	40000
	HR[1,5]	1.979	0.658	0.009871	1.013	1.868	3.555	10001	40000			HR[1,5]	1.911	0.6472	0.01199	0.9748	1.804	3.465	10001	40000
	HR[2,1]	0.7921	0.5205	0.008634	0.1708	0.6647	2.125	10001	40000			HR[2,1]	0.7996	0.5415	0.008793	0.1629	0.6705	2.197	10001	40000
	HR[2,3]	0.8195	0.5417	0.00851	0.1759	0.686	2.229	10001	40000			HR[2,3]	0.8181	0.5496	0.00898	0.1662	0.6908	2.228	10001	40000
	HR[2,4]	0.9041	0.5739	0.009052	0.2063	0.7666	2.388	10001	40000			HR[2,4]	0.8877	0.5673	0.008933	0.1913	0.7597	2.364	10001	40000
	HR[2,5]	1.532	1.098	0.01816	0.3018	1.252	4.38	10001	40000			HR[2,5]	1.496	1.102	0.0188	0.2744	1.217	4.395	10001	40000
	HR[3,1]	0.991	0.2192	0.004324	0.635	0.9669	1.498	10001	40000			HR[3,1]	1.002	0.2295	0.005196	0.6259	0.9748	1.523	10001	40000
	HR[3,2]	1.862	1.547	0.02122	0.4487	1.458	5.695	10001	40000			HR[3,2]	1.894	1.632	0.02374	0.4488	1.448	6.017	10001	40000
	HR[3,4]	1.138	0.222	0.00317	0.7635	1.117	1.635	10001	40000			HR[3,4]	1.122	0.2227	0.003358	0.7405	1.104	1.616	10001	40000
	HR[3,5]	1.937	0.7184	0.0146	0.9165	1.808	3.631	10001	40000			HR[3,5]	1.894	0.7256	0.01666	0.8793	1.766	3.675	10001	40000
	HR[4,1]	0.887	0.1953	0.003685	0.5651	0.8646	1.328	10001	40000			HR[4,1]	0.9102	0.208	0.004474	0.5708	0.8865	1.379	10001	40000
	HR[4,2]	1.648	1.353	0.01795	0.4188	1.304	4.848	10001	40000			HR[4,2]	1.698	1.417	0.02024	0.4232	1.316	5.228	10001	40000
	HR[4,3]	0.9122	0.1783	0.002516	0.6115	0.8956	1.31	10001	40000			HR[4,3]	0.9265	0.1862	0.002755	0.619	0.9062	1.351	10001	40000
	HR[4,5]	1.724	0.6109	0.01137	0.8435	1.615	3.177	10001	40000			HR[4,5]	1.707	0.6118	0.01304	0.8329	1.602	3.184	10001	40000
	HR[5,1]	0.5594	0.1807	0.002834	0.2815	0.5352	0.9869	10001	40000			HR[5,1]	0.5813	0.1906	0.003523	0.2886	0.5543	1.026	10001	40000
	HR[5,2]	1.057	1.021	0.01402	0.2286	0.799	3.313	10001	40000			HR[5,2]	1.104	1.001	0.01555	0.2275	0.8214	3.644	10001	40000
	HR[5,3]	0.5847	0.2106	0.004221	0.2754	0.5532	1.091	10001	40000			HR[5,3]	0.604	0.2266	0.005215	0.2721	0.5665	1.137	10001	40000
	HR[5,4]	0.6493	0.221	0.004053	0.3148	0.6194	1.186	10001	40000			HR[5,4]	0.6597	0.2325	0.00493	0.3142	0.6241	1.201	10001	40000
	rh[1]	0.8139	0.1319	0.003107	0.5852	0.8015	1.104	10001	40000			rh[1]	0.7882	0.1279	0.003147	0.57	0.7771	1.065	10001	40000
	rh[2]	0.6335	0.4115	0.007469	0.1396	0.5342	1.698	10001	40000			rh[2]	0.6195	0.4129	0.007333	0.1276	0.5217	1.654	10001	40000
	rh[3]	0.7965	0.1778	0.005191	0.5077	0.7763	1.209	10001	40000			rh[3]	0.7808	0.1842	0.005744	0.4831	0.7605	1.192	10001	40000
	rh[4]	0.7089	0.1371	0.003848	0.482	0.6946	1.026	10001	40000			rh[4]	0.7046	0.143	0.004321	0.4661	0.6911	1.025	10001	40000
	rh[5]	0.4445	0.1255	0.00175	0.2429	0.4314	0.7319	10001	40000			rh[5]	0.4465	0.1258	0.001917	0.2417	0.4329	0.7272	10001	40000
	tau2	0.3007	0.3339	0.002552	0.06478	0.2167	1.047	10001	40000			tau2	0.4178	0.5205	0.005191	0.07879	0.2835	1.579	10001	40000
Dbar = post.mean of -2logL; Dhat = -2LogL at post.mean of stochastic nodes											Dbar = post.mean of -2logL; Dhat = -2LogL at post.mean of stochastic nodes
	Dbar	Dhat	pD	DIC								Dbar	Dhat	pD	DIC
r	85.128	74.08	11.049	96.177							r	85.121	73.857	11.264	96.384
total	85.128	74.08	11.049	96.177							total	85.121	73.857	11.264	96.384

## Sheet: Sheet2
Summary of findings: CDP6M
		Vague priors	Weakly informative		Column1	Column2
	DIC-with INCOMIN	108.053	108.142		Conclusion	There were no differences with between the results of vague priors and weakly informative priors on between study variance
	DIC-without INCOMIN	96.17	96.344		Model fit	In both the scenarios i.e. with and without INCOMIN DIC values were comparable between vague prior model and weakly informative prior model
Results_Vague priors for between study variance											Results _weakly informative prior for between trail variance
With INCOMIN											With INCOMIN
		IFN beta-1a 30 mcg once weekly	IFN beta-1b 250 mcg EOD	IFN beta-1a 44 mcg tiw	GA 20 mg od	PEG IFN beta-1a 125 mcg q2w	Placebo					IFN beta-1a 30 mcg once weekly	IFN beta-1b 250 mcg EOD	IFN beta-1a 44 mcg tiw	GA 20 mg od	PEG IFN beta-1a 125 mcg q2w	Placebo
	IFN beta-1a 30 mcg once weekly	-	1.99 (1.13 to 3.66)	1.09 (0.71 to 1.66)	1.22 (0.8 to 1.82)	1.92 (1.03 to 3.67)	0.81 (0.59 to 1.11)				IFN beta-1a 30 mcg once weekly	-	2.01 (1.14 to 3.72)	1.07 (0.69 to 1.65)	1.2 (0.78 to 1.85)	1.89 (1.02 to 3.64)	0.81 (0.58 to 1.11)
	IFN beta-1b 250 mcg EOD	0.5 (0.27 to 0.89)	-	0.55 (0.27 to 1.09)	0.61 (0.3 to 1.18)	0.97 (0.41 to 2.3)	0.41 (0.21 to 0.77)				IFN beta-1b 250 mcg EOD	0.5 (0.27 to 0.88)	-	0.53 (0.26 to 1.06)	0.6 (0.29 to 1.16)	0.94 (0.4 to 2.19)	0.4 (0.2 to 0.75)
	IFN beta-1a 44 mcg tiw	0.92 (0.6 to 1.4)	1.83 (0.92 to 3.72)	-	1.12 (0.76 to 1.63)	1.77 (0.89 to 3.59)	0.75 (0.48 to 1.15)				IFN beta-1a 44 mcg tiw	0.93 (0.61 to 1.46)	1.88 (0.94 to 3.91)	-	1.12 (0.77 to 1.64)	1.76 (0.88 to 3.69)	0.75 (0.48 to 1.21)
	GA 20 mg od	0.82 (0.55 to 1.26)	1.63 (0.85 to 3.31)	0.89 (0.62 to 1.32)	-	1.58 (0.84 to 3.08)	0.67 (0.46 to 0.97)				GA 20 mg od	0.83 (0.54 to 1.28)	1.68 (0.86 to 3.41)	0.89 (0.61 to 1.3)	-	1.58 (0.81 to 3.13)	0.67 (0.46 to 0.98)
	PEG IFN beta-1a 125 mcg q2w	0.52 (0.27 to 0.97)	1.03 (0.44 to 2.44)	0.57 (0.28 to 1.12)	0.63 (0.33 to 1.19)	-	0.42 (0.24 to 0.72)				PEG IFN beta-1a 125 mcg q2w	0.53 (0.28 to 0.98)	1.06 (0.46 to 2.51)	0.57 (0.27 to 1.14)	0.63 (0.32 to 1.24)	-	0.43 (0.24 to 0.73)
Dbar = post.mean of -2logL; Dhat = -2LogL at post.mean of stochastic nodes											Dbar = post.mean of -2logL; Dhat = -2LogL at post.mean of stochastic nodes
	Dbar	Dhat	pD	DIC								Dbar	Dhat	pD	DIC
r	95.834	83.615	12.219	108.053							r	95.75	83.358	12.392	108.142
total	95.834	83.615	12.219	108.053							total	95.75	83.358	12.392	108.142
Model comparison
	Vague priors	Weakly informative
DIC	108.053	108.142
		IFN beta-1a 30 mcg once weekly	IFN beta-1b 250 mcg EOD	IFN beta-1a 44 mcg tiw	GA 20 mg od	PEG IFN beta-1a 125 mcg q2w	Placebo					IFN beta-1a 30 mcg once weekly	IFN beta-1b 250 mcg EOD	IFN beta-1a 44 mcg tiw	GA 20 mg od	PEG IFN beta-1a 125 mcg q2w	Placebo
	IFN beta-1a 30 mcg once weekly	-	1.49 (0.46 to 6.14)	1.03 (0.66 to 1.6)	1.13 (0.73 to 1.75)	1.8 (0.97 to 3.47)	0.8 (0.59 to 1.1)				IFN beta-1a 30 mcg once weekly	-	1.49 (0.46 to 6.14)	1.03 (0.66 to 1.6)	1.13 (0.73 to 1.75)	1.8 (0.97 to 3.47)	0.78 (0.57 to 1.07)
	IFN beta-1b 250 mcg EOD	0.67 (0.16 to 2.2)	-	0.69 (0.17 to 2.23)	0.76 (0.19 to 2.36)	1.22 (0.27 to 4.4)	0.53 (0.14 to 1.7)				IFN beta-1b 250 mcg EOD	0.67 (0.16 to 2.2)	-	0.69 (0.17 to 2.23)	0.76 (0.19 to 2.36)	1.22 (0.27 to 4.4)	0.52 (0.13 to 1.65)
	IFN beta-1a 44 mcg tiw	0.97 (0.63 to 1.52)	1.45 (0.45 to 6.02)	-	1.1 (0.74 to 1.62)	1.77 (0.88 to 3.68)	0.78 (0.51 to 1.21)				IFN beta-1a 44 mcg tiw	0.97 (0.63 to 1.52)	1.45 (0.45 to 6.02)	-	1.1 (0.74 to 1.62)	1.77 (0.88 to 3.68)	0.76 (0.48 to 1.19)
	GA 20 mg od	0.89 (0.57 to 1.38)	1.32 (0.42 to 5.23)	0.91 (0.62 to 1.35)	-	1.6 (0.83 to 3.18)	0.69 (0.48 to 1.03)				GA 20 mg od	0.89 (0.57 to 1.38)	1.32 (0.42 to 5.23)	0.91 (0.62 to 1.35)	-	1.6 (0.83 to 3.18)	0.69 (0.47 to 1.03)
	PEG IFN beta-1a 125 mcg q2w	0.55 (0.29 to 1.03)	0.82 (0.23 to 3.64)	0.57 (0.27 to 1.14)	0.62 (0.31 to 1.2)	-	0.43 (0.24 to 0.73)				PEG IFN beta-1a 125 mcg q2w	0.55 (0.29 to 1.03)	0.82 (0.23 to 3.64)	0.57 (0.27 to 1.14)	0.62 (0.31 to 1.2)	-	0.43 (0.24 to 0.73)
Dbar = post.mean of -2logL; Dhat = -2LogL at post.mean of stochastic nodes											Dbar = post.mean of -2logL; Dhat = -2LogL at post.mean of stochastic nodes
	Dbar	Dhat	pD	DIC								Dbar	Dhat	pD	DIC
r	85.128	74.08	11.049	96.177							r	85.121	73.857	11.264	96.384
total	85.128	74.08	11.049	96.177							total	85.121	73.857	11.264	96.384
